# Supplementary material
Source: PubMed Central journal article supplement (PMC4087046)

# Supplementary Figure 1

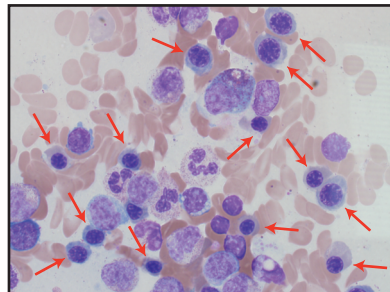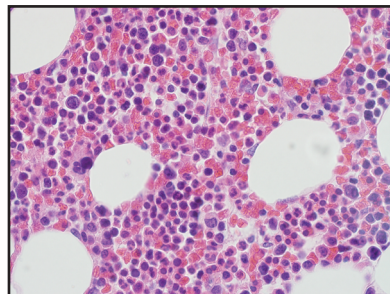

Supplementary Figure 2

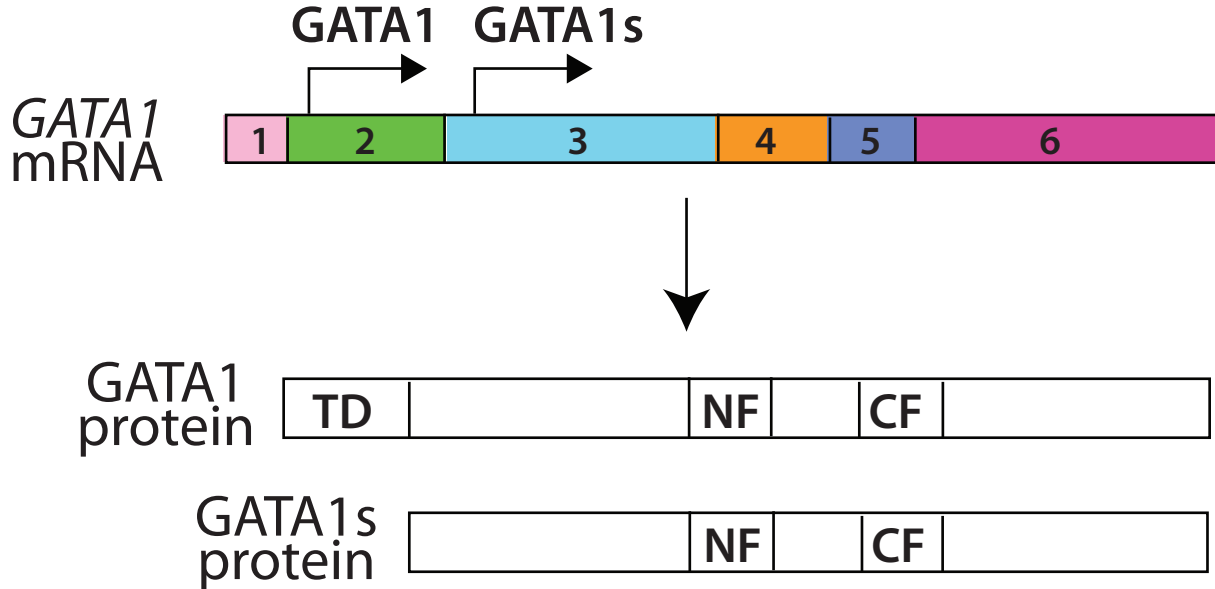

# Supplementary Figure 3

Wild-type  
GATA1-HMD

CCATGGA

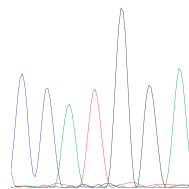

Mutant  
GATA1-HMD

CCACGGA

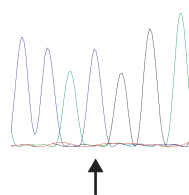

# Supplementary Figure 4

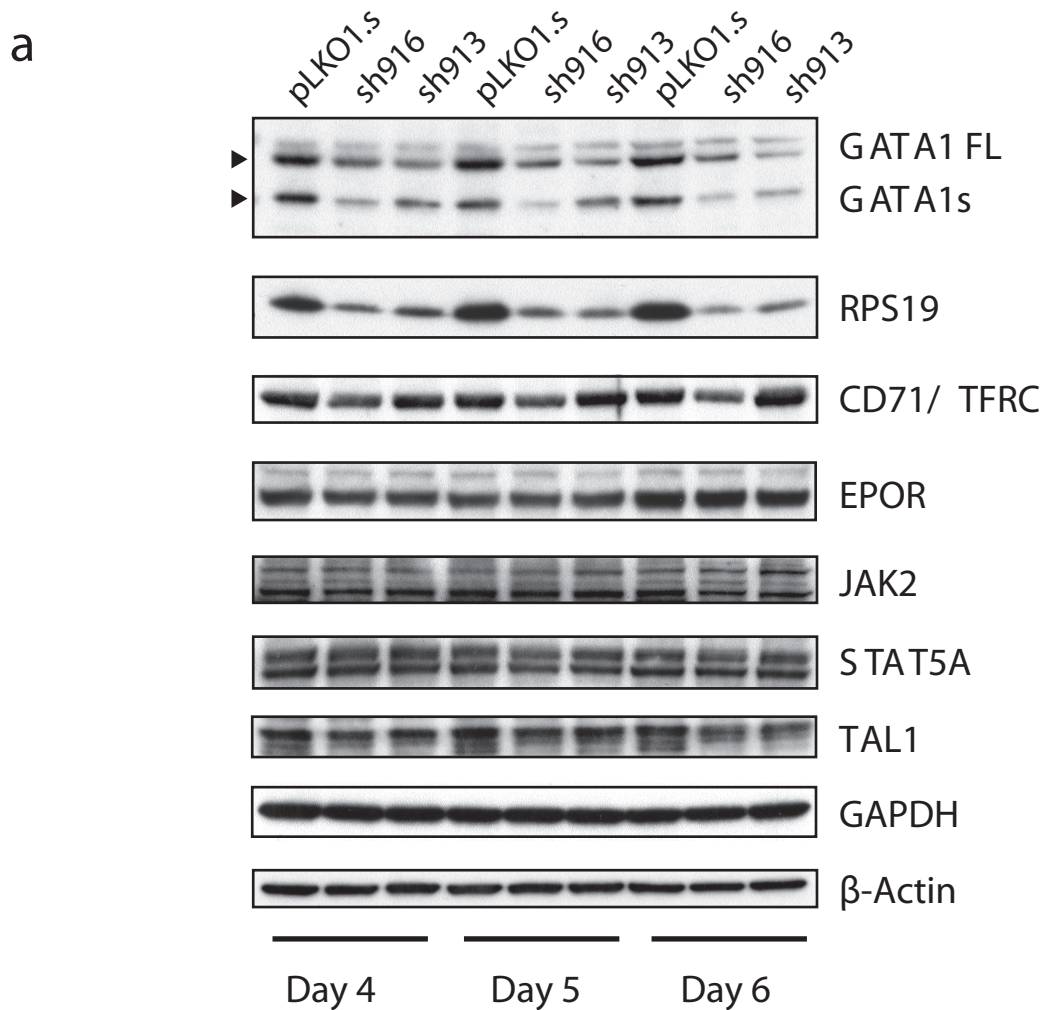

b

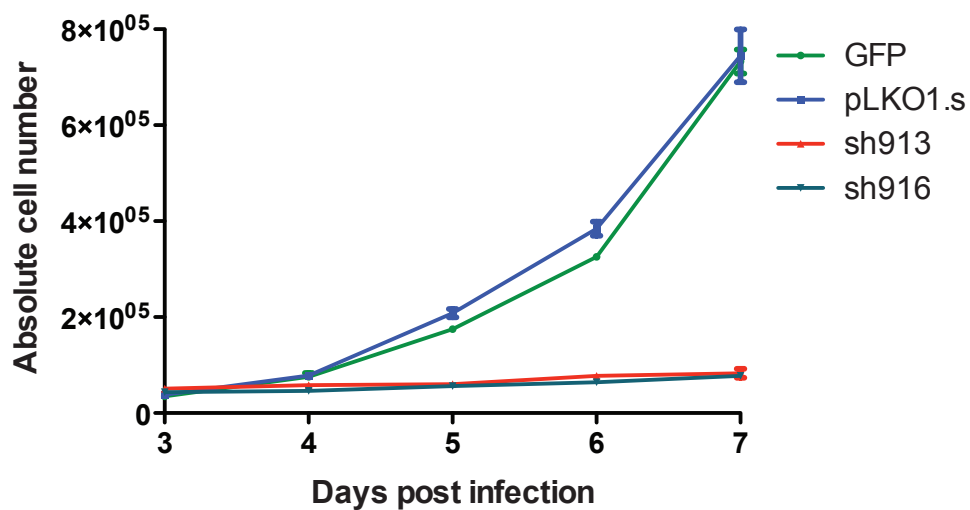

# Supplementary Figure 5

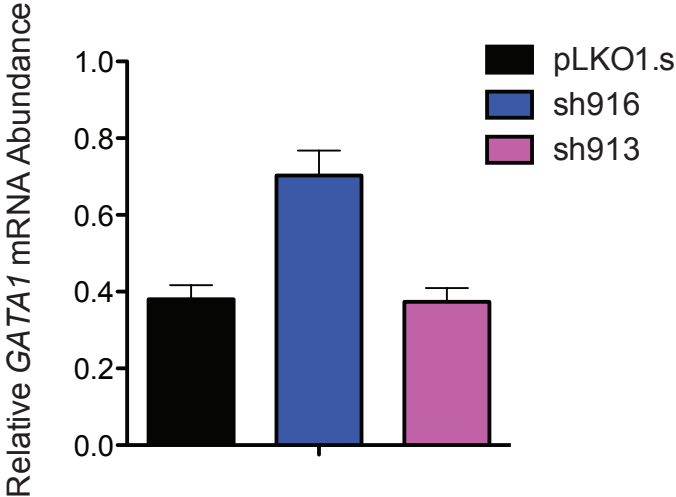

# Supplementary Figure 6

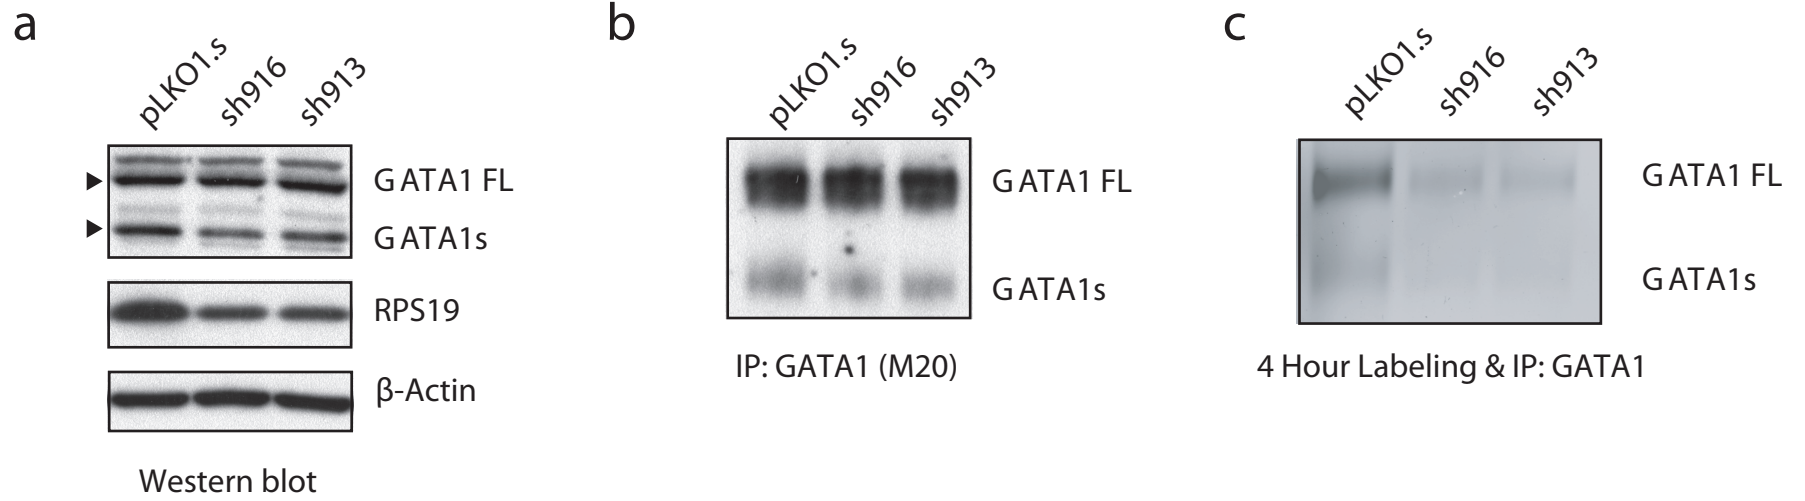

Supplementary Figure 7

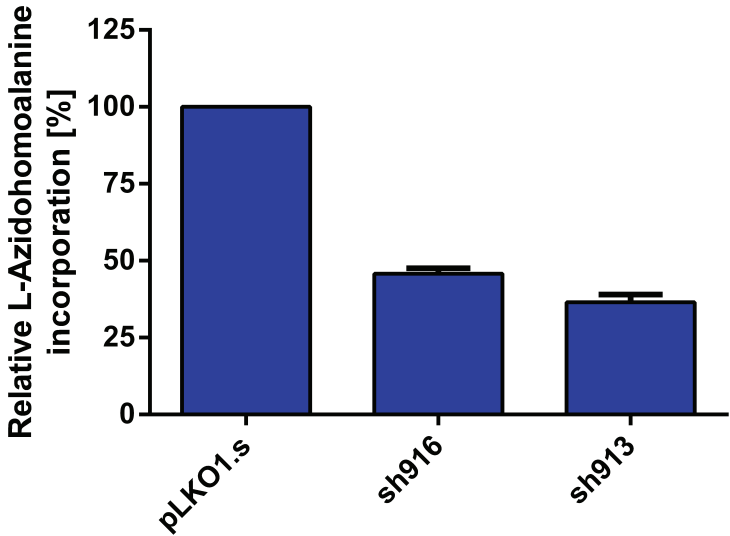

Supplementary Figure 8

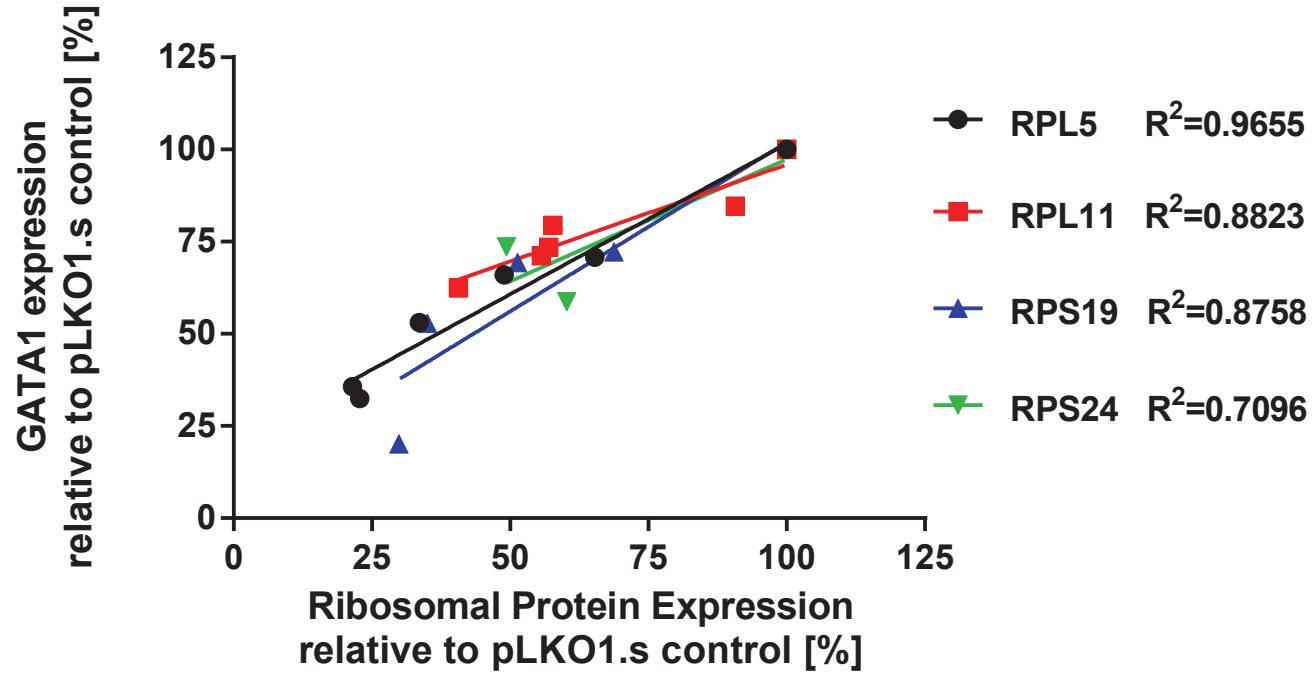



# Supplementary Figure 9

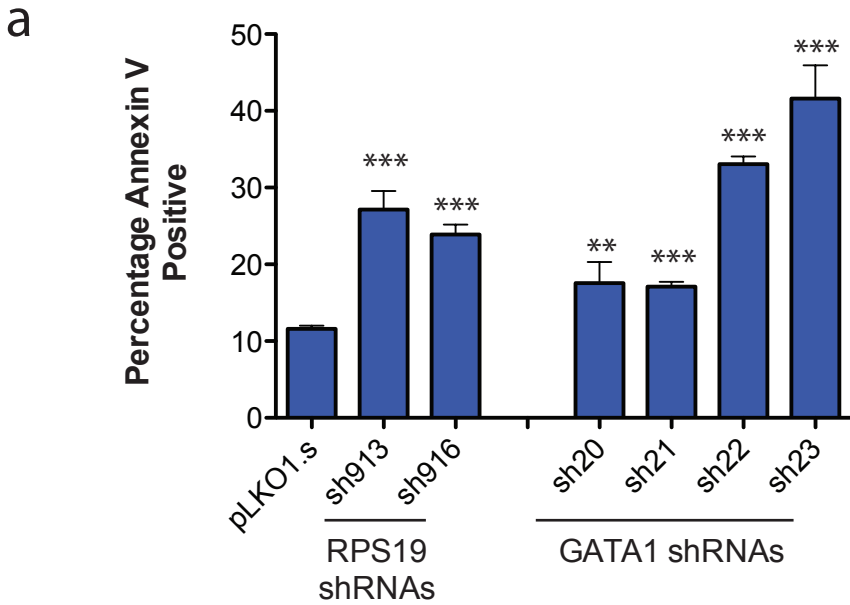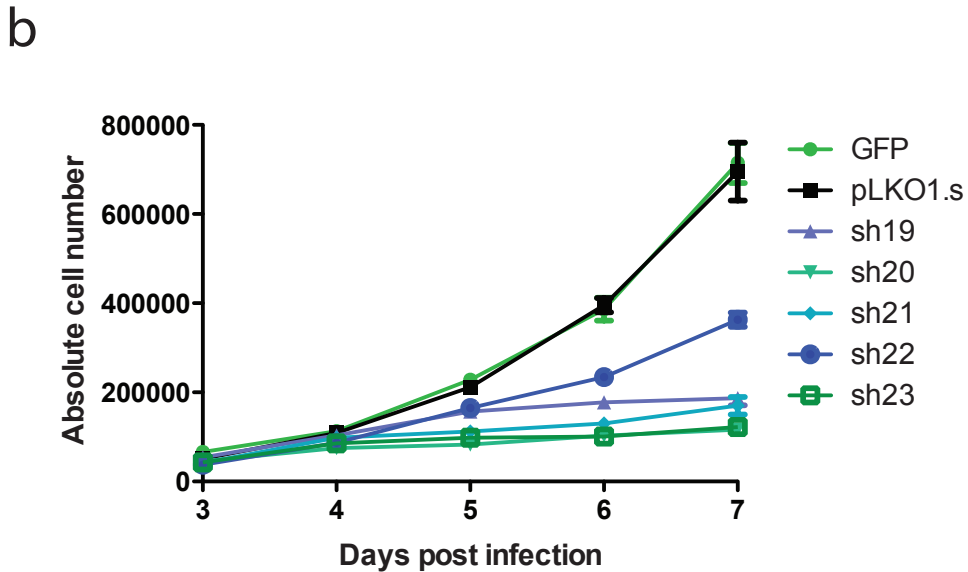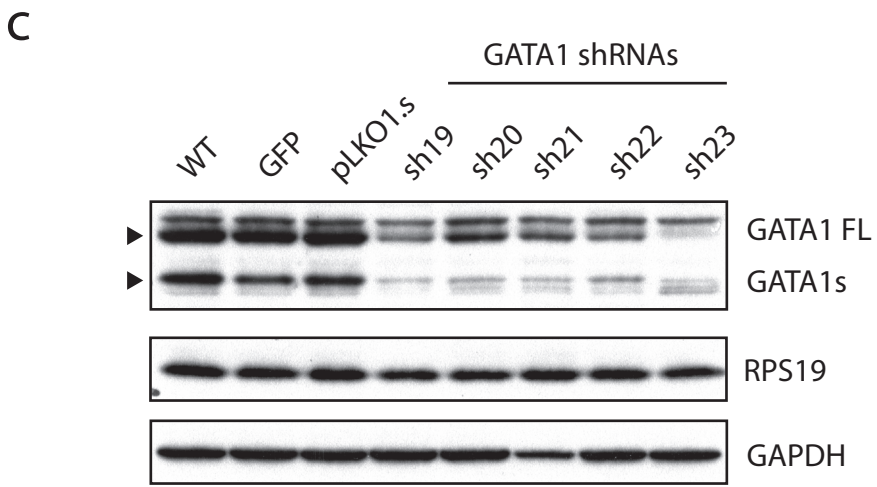

# Supplementary Figure 10

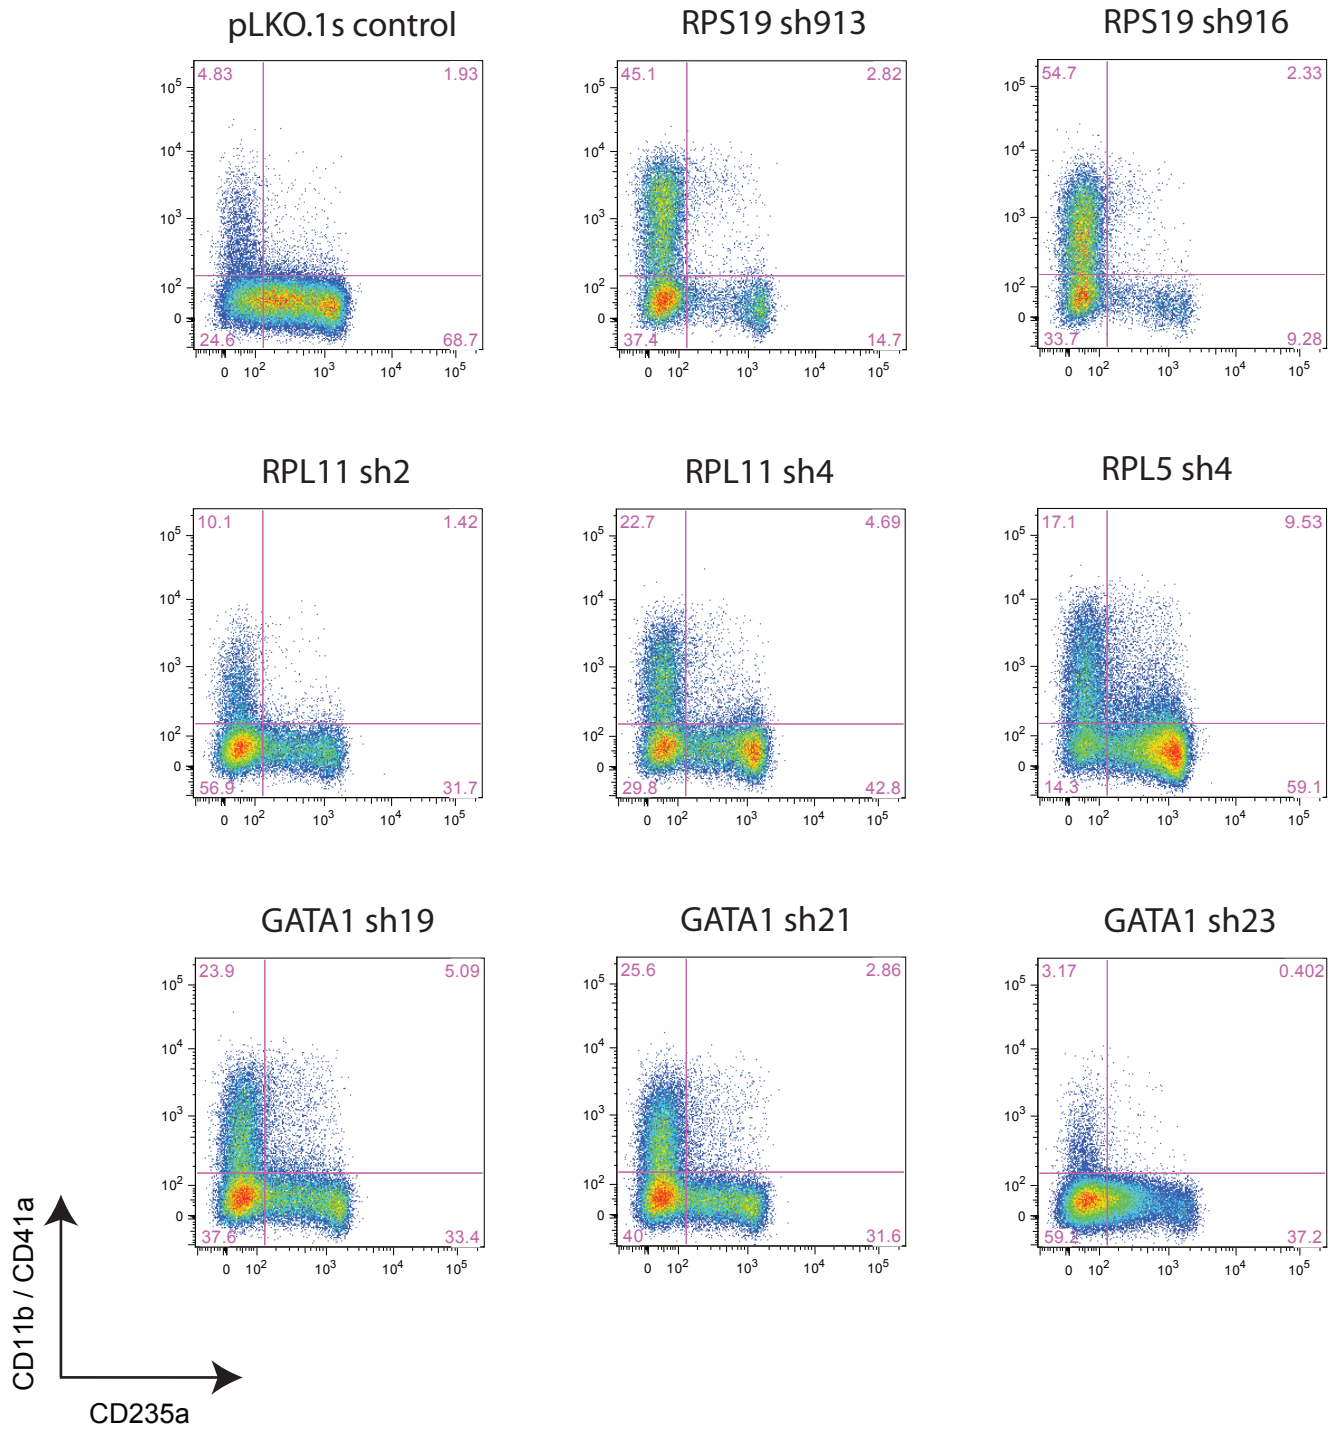

# Supplementary Figure 11

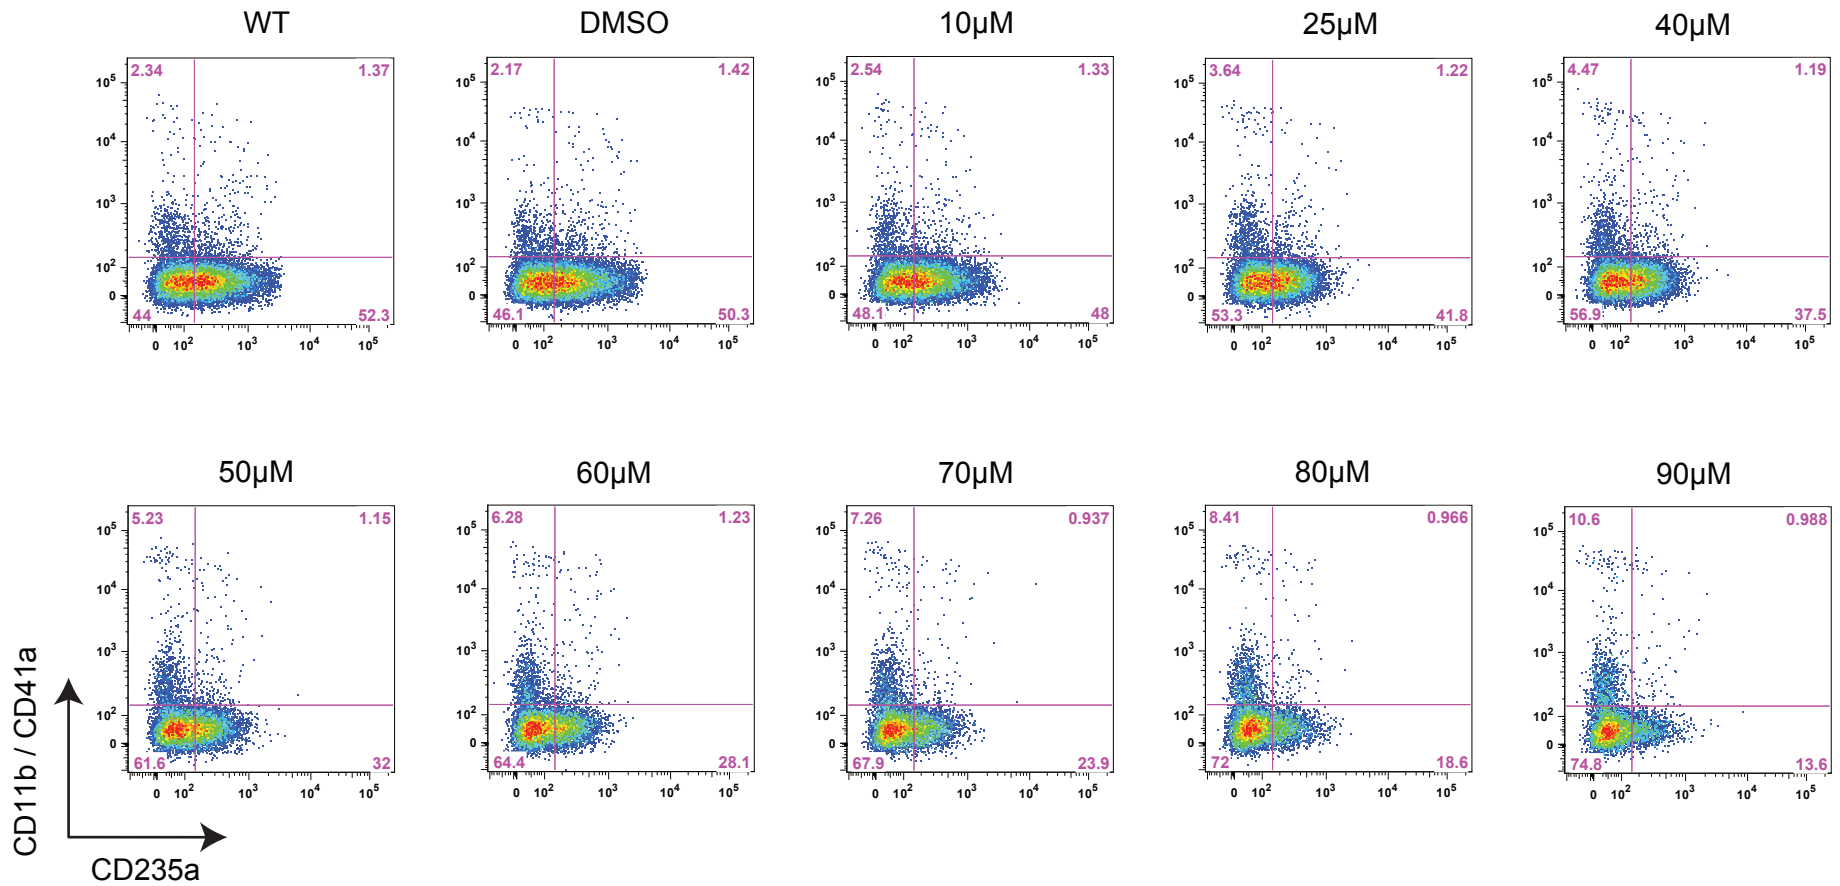

# Supplementary Figure 12

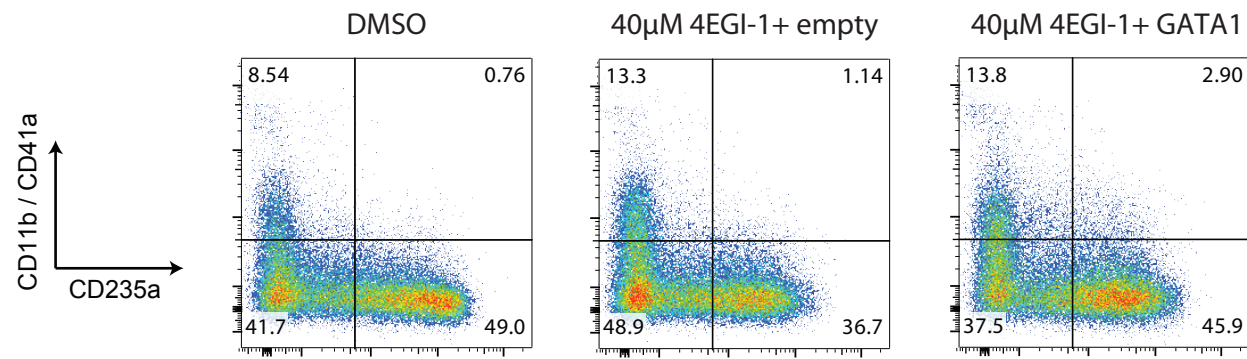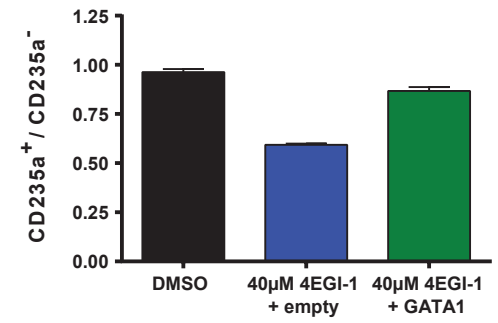

# Supplementary Figure 13

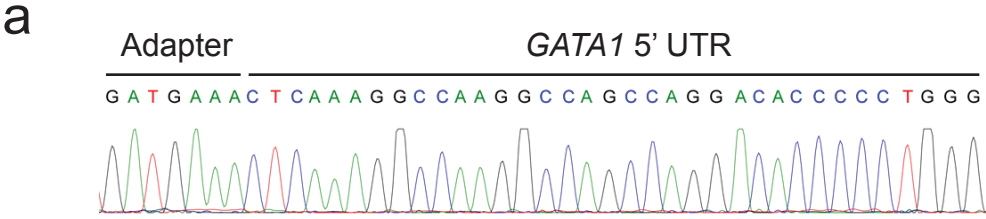

**b**

CTCAAAGGCCAAGGCCAGCCAGGACACCCCCTGGGATCACA  
 CTGAGCTTGCCACATCCCCAAGGCGGCCGAACCCCTCCGCAA  
 CCACCAGCCCAGGTTAATCCCCAGAGGCTCCATG

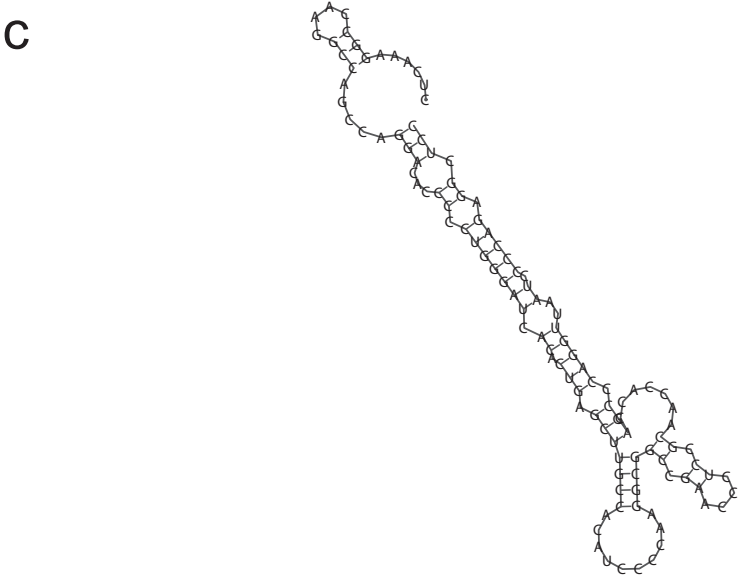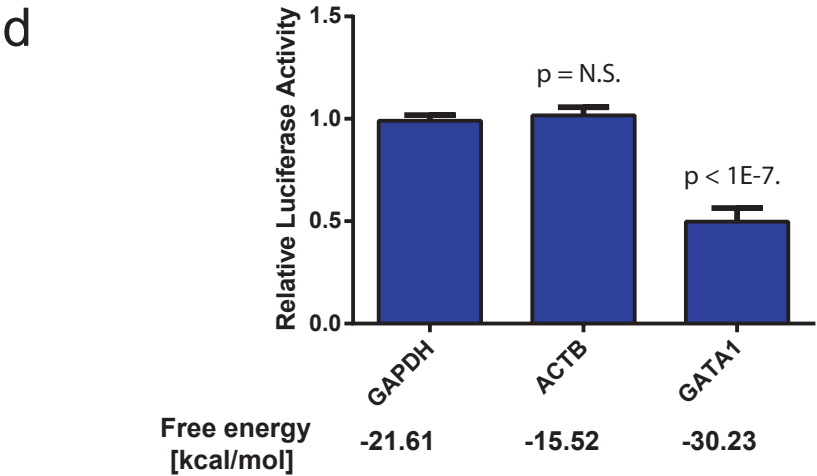

# Supplementary Figure 14

a

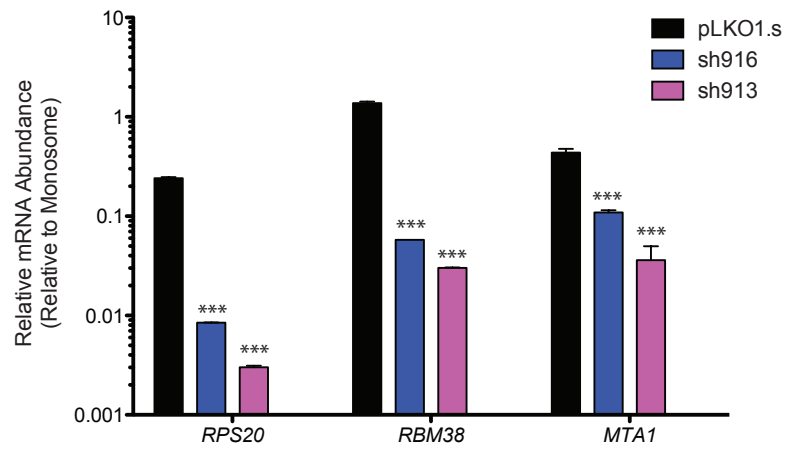

b

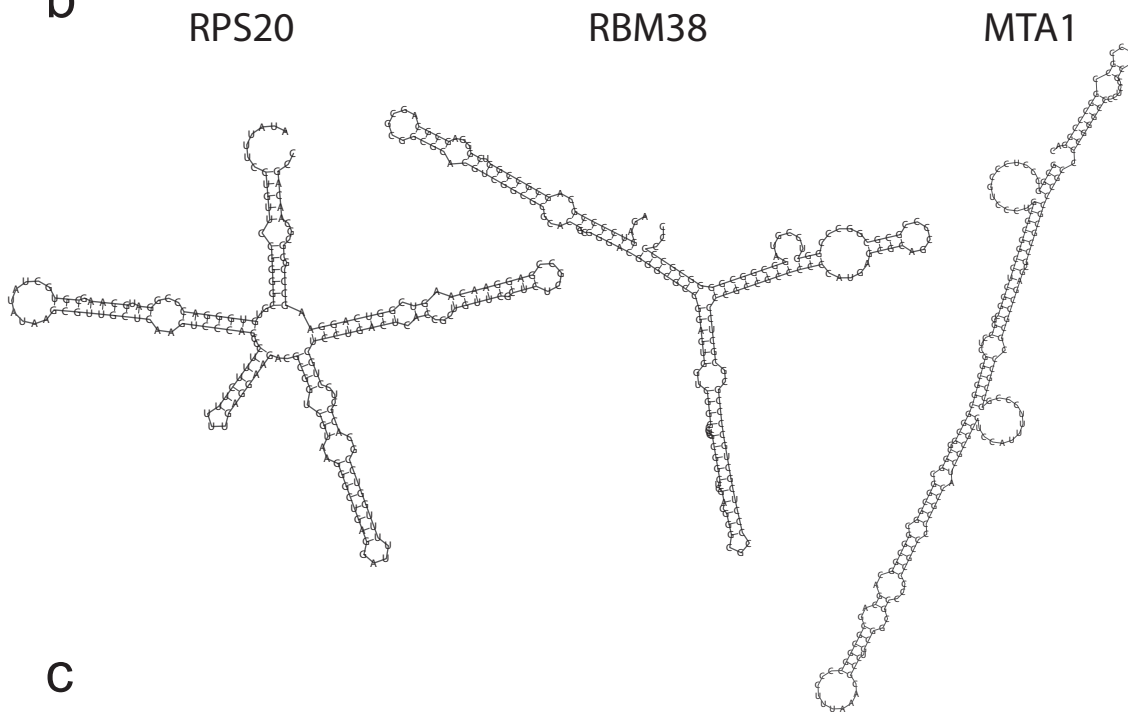

c

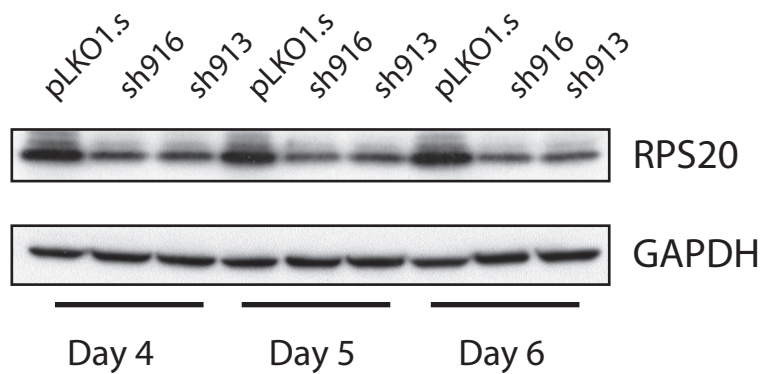

# Supplementary Figure 15

a

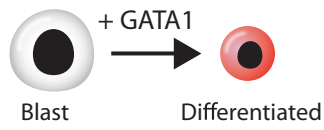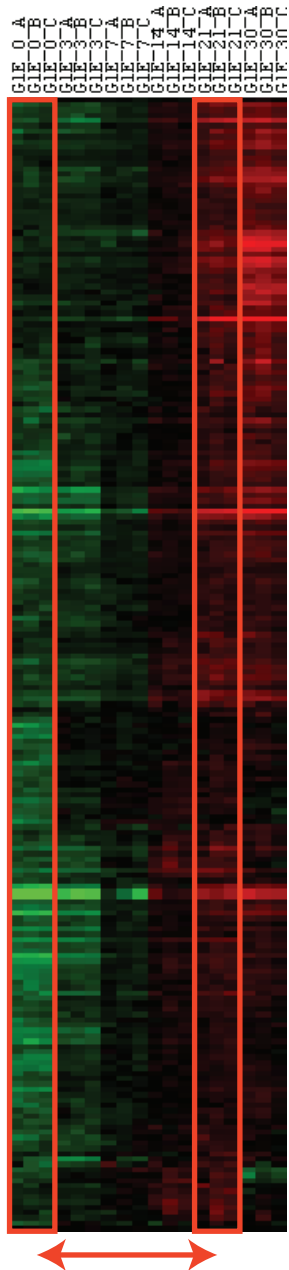

b

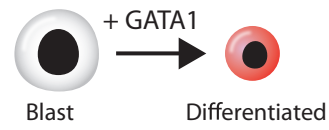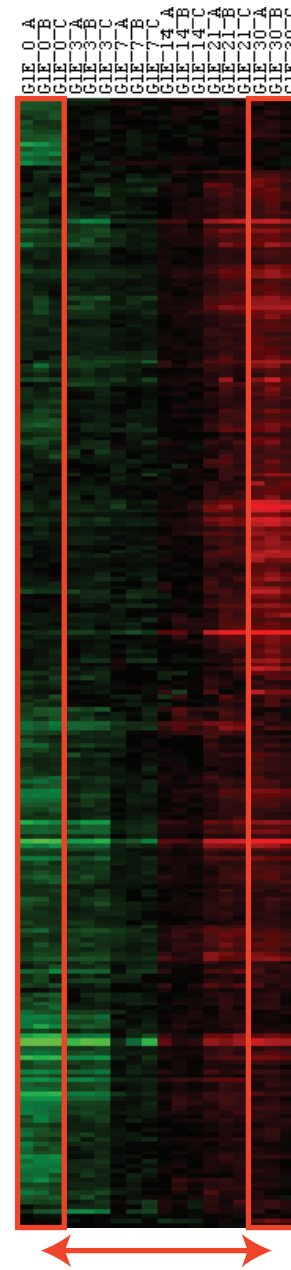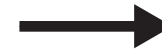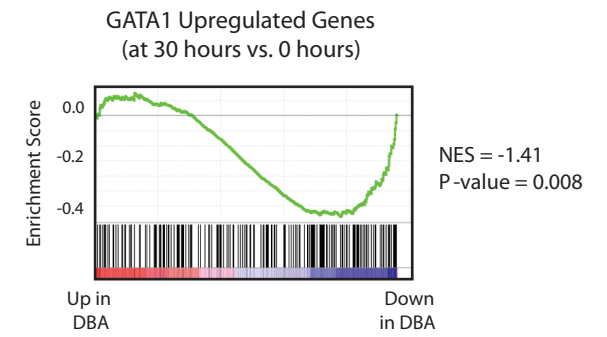

# Supplementary Figure 16

a

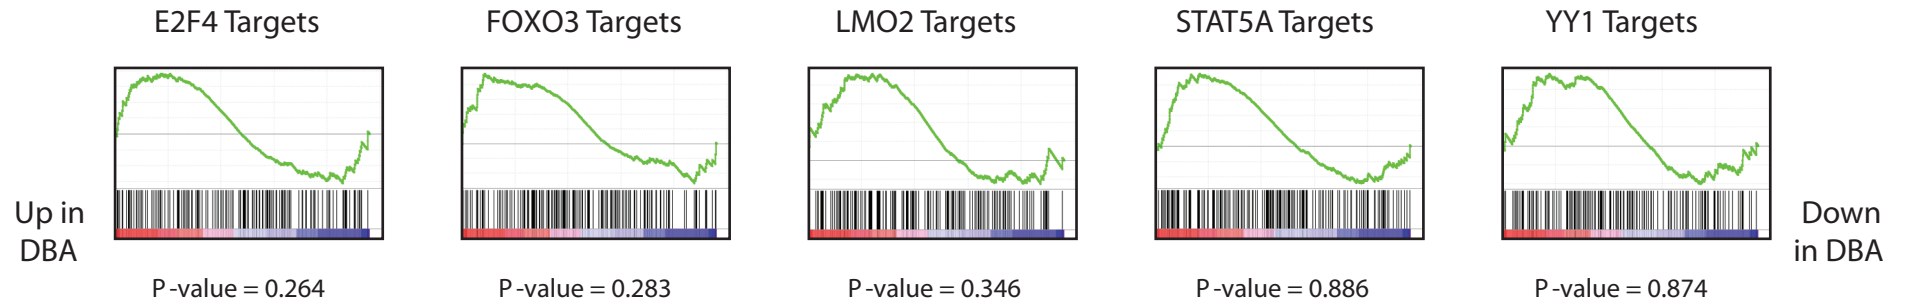

b

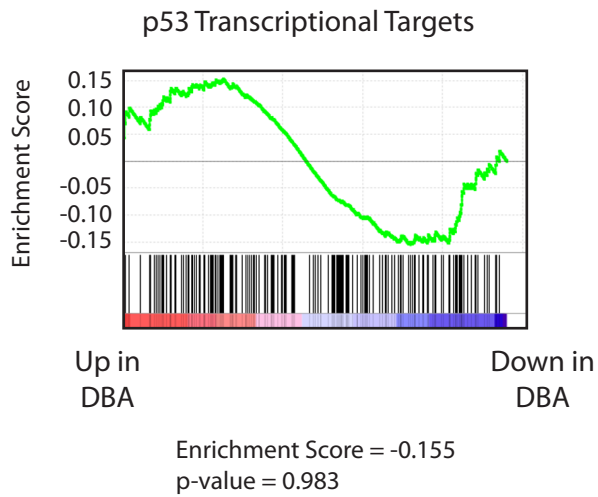



# Supplementary Figure 17

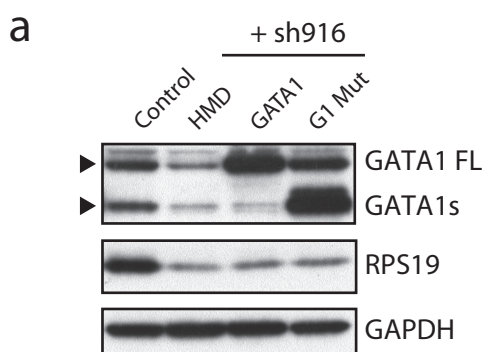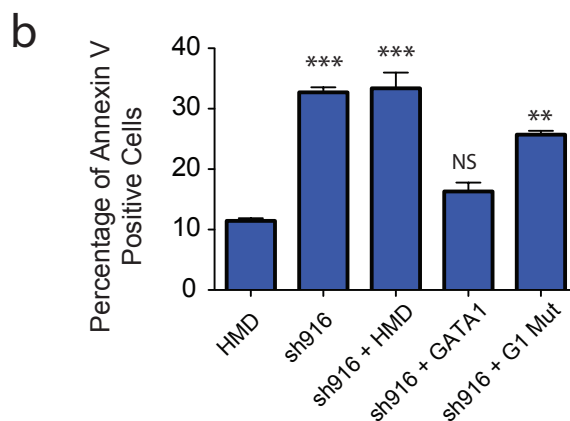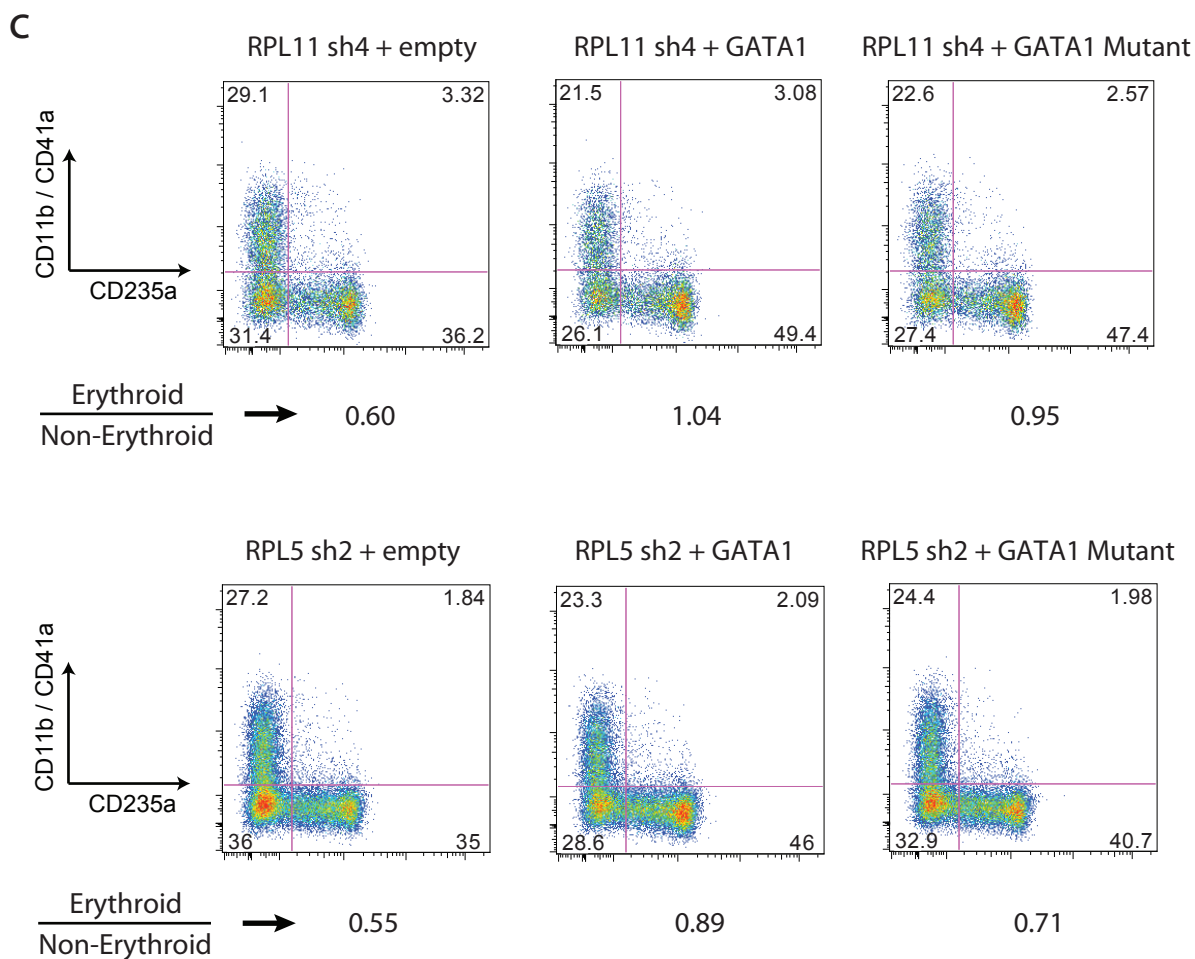

# Supplementary Figure 18

+ empty

+ GATA1

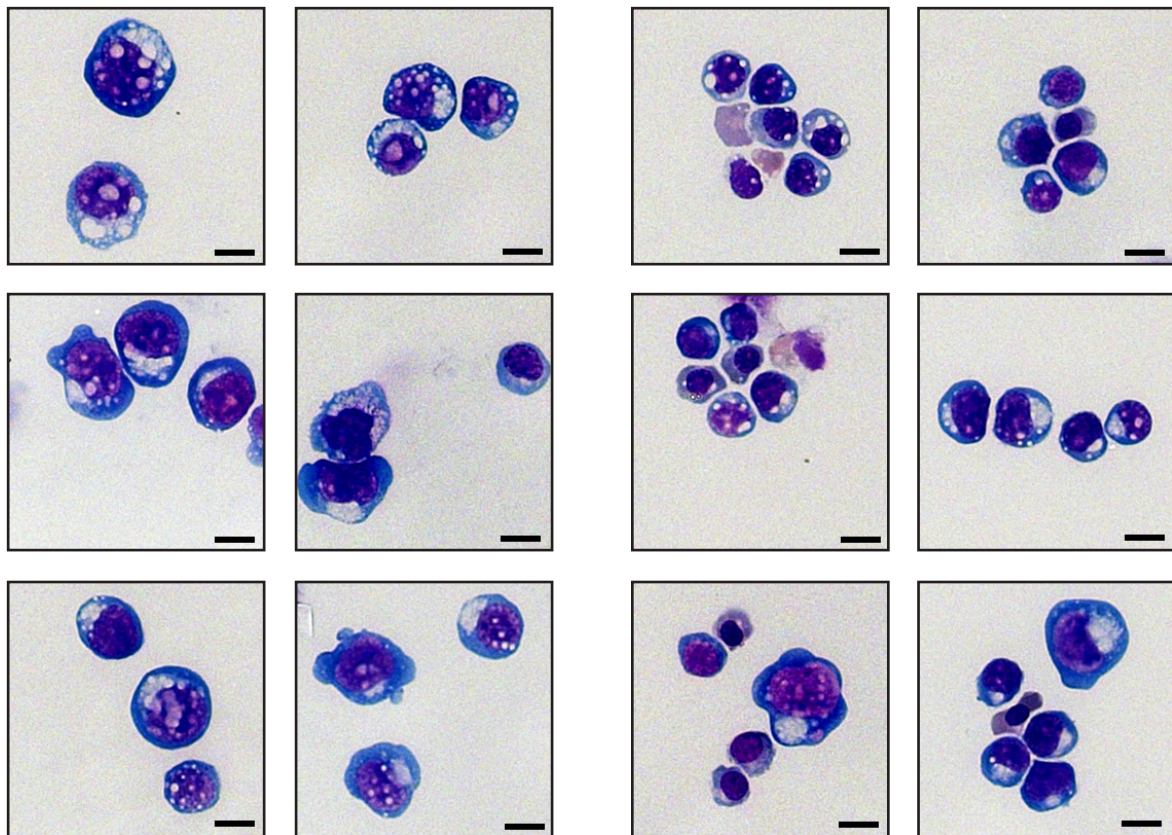

Supplementary Figure 19

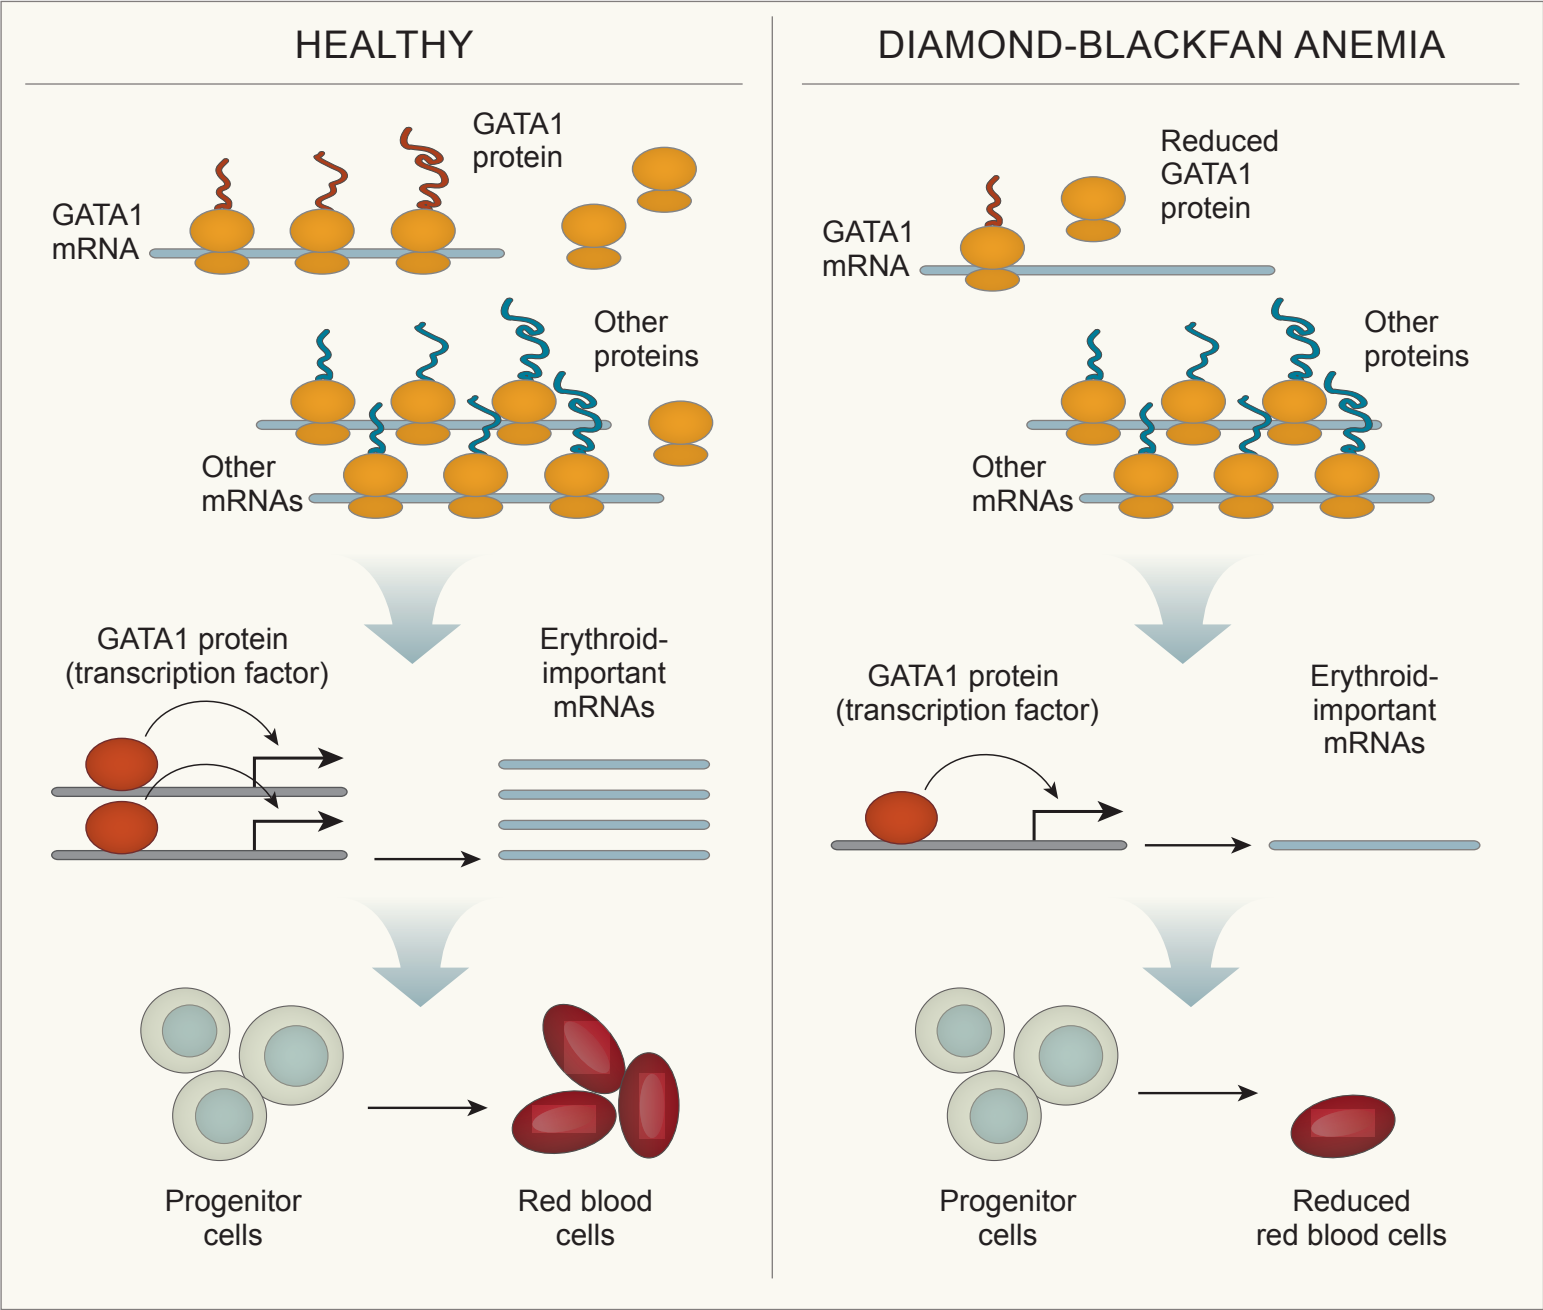

Supplement: NIHMS585070-supplement-2.pdf [file NIHMS585070-supplement-2.pdf]
